# Supplementary material for: Consumer Awareness of the Degree of Industrial Food Processing and the Association with Healthiness—A Pilot Study
Source: MDPI journal article supplement (doi:10.3390/nu14204438), 2022-10-21
Supplement: s1 [file s1]

**Supplementary Table S1.** Selected product categories with product pictures divided by degree of processing and healthiness.

| Products categories     | Food products                                                                                                                                                             |                                                                                                                                             |                                                                                                                                                 |
|-------------------------|---------------------------------------------------------------------------------------------------------------------------------------------------------------------------|---------------------------------------------------------------------------------------------------------------------------------------------|-------------------------------------------------------------------------------------------------------------------------------------------------|
|                         | Minimally processed/processed foods<br>(NOVA 1/NOVA 3)                                                                                                                    | Ultra-Processed foods<br>(NOVA 4)<br>Unhealthy (Nutri-Score C, D or E)                                                                      | Ultra-Processed foods<br>(NOVA 4)<br>Healthy (Nutri-Score A or B)                                                                               |
| Cereals and derivatives | <p>Oatmeal (NOVA 1, Nutri-Score A)</p> <p>Cereals</p>                                    | <p>Cereals filled with chocolate (Nutri-Score D)</p>      | <p>Granola with nuts, seeds and honey (Nutri-Score A)</p>    |
|                         | <p>Freshly baked French bread (NOVA 3, Nutri-Score B)</p> <p>Bread</p>                  | <p>Freshly baked butter croissant. (Nutri-Score D)</p>  | <p>Packaged bread with multiple seeds (Nutri-Score A)</p>  |
|                         | <p>Rice waffle with sea salt. (NOVA 3, Nutri-Score A)<sup>1</sup></p> <p>Biscuits</p>  | <p>Wheat cookie. (Nutri-Score E)</p>                    | <p>Grain cracker with multiple seeds. (Nutri-Score B)</p>  |

|                      |           |                                                                                                                                           |                                                                                      |                                                                                       |
|----------------------|-----------|-------------------------------------------------------------------------------------------------------------------------------------------|--------------------------------------------------------------------------------------|---------------------------------------------------------------------------------------|
| Sugar and sodas      | Beverages | Freshly squeezed orange juice.<br>(Nutri-Score B, NOVA 1)                                                                                 | Sparkling lemonade (Nutri-Score D)                                                   | Cola light (Nutri-Score B)                                                            |
|                      |           |                                                          |    |    |
|                      |           |                                                                                                                                           |                                                                                      |                                                                                       |
| Meats                | Beef      | Medium rare steak (Nutri-Score A when uncooked when cooked depends on the amount of oil and salt used etc can become b or c then. NOVA 1) | Sausage (Nutri-Score D)                                                              | Beef replacer with vegetables (Nutri-Score A).                                        |
|                      |           |                                                         |   |   |
|                      |           |                                                                                                                                           |                                                                                      |                                                                                       |
| Milk and derivatives | Chicken   | Roasted chicken filets. (NOVA 3, Nutri-Score A) <sup>1</sup>                                                                              | Fried chicken nuggets. (Nutri-Score D)                                               | Tofu (Nutri-Score A)                                                                  |
|                      |           |                                                        |  |  |
|                      |           |                                                                                                                                           |                                                                                      |                                                                                       |
| Milk and derivatives | Milk      | Pasteurized semi skimmed milk (Nutri-Score A, NOVA 1)                                                                                     | Skimmed milk flavoured with strawberry juice (Nutri-Score E)                         | Semi-skimmed chocolate milk without added sugars (Nutri-Score B)                      |
|                      |           |                                                        |  |  |
|                      |           |                                                                                                                                           |                                                                                      |                                                                                       |

|                    |        |                                                                                     |                                                                                          |                                                                                       |
|--------------------|--------|-------------------------------------------------------------------------------------|------------------------------------------------------------------------------------------|---------------------------------------------------------------------------------------|
| Yogurt             |        | Semi-skimmed plain yogurt (Nutri-Score A, NOVA 1)                                   | Stracciatella full-fat yogurt (Nutri-Score C)                                            | Semi-skimmed fruit flavoured yogurt (Nutri-Score B)                                   |
|                    |        |    |        |    |
|                    |        |                                                                                     |                                                                                          |                                                                                       |
| Potato             |        | Boiled potato (Nutri-Score A, NOVA 1)                                               | Paprika flavoured chips (Nutri-Score D)                                                  | Oven baked French fries with no added salt (Nutri-Score B)                            |
|                    |        |   |       |   |
|                    |        |                                                                                     |                                                                                          |                                                                                       |
| Ready-to-eat meals |        | Cooked fusilli pasta (Nutri-Score A, NOVA 1)                                        | Ready to eat pasta with red sauce containing ham and cheese (Nutri-Score C) <sup>1</sup> | Ready to eat pasta pesto with vegetables (Nutri-Score B)                              |
|                    |        |  |      |  |
|                    |        |                                                                                     |                                                                                          |                                                                                       |
| Vegetables         | Tomato | Canned tomato (NOVA 3 Nutri-Score A)                                                | Tomato ketchup (Nutri-Score C)                                                           | Tomato ketchup with reduced sugar and salt (Nutri-Score B)                            |
|                    |        |  |      |  |



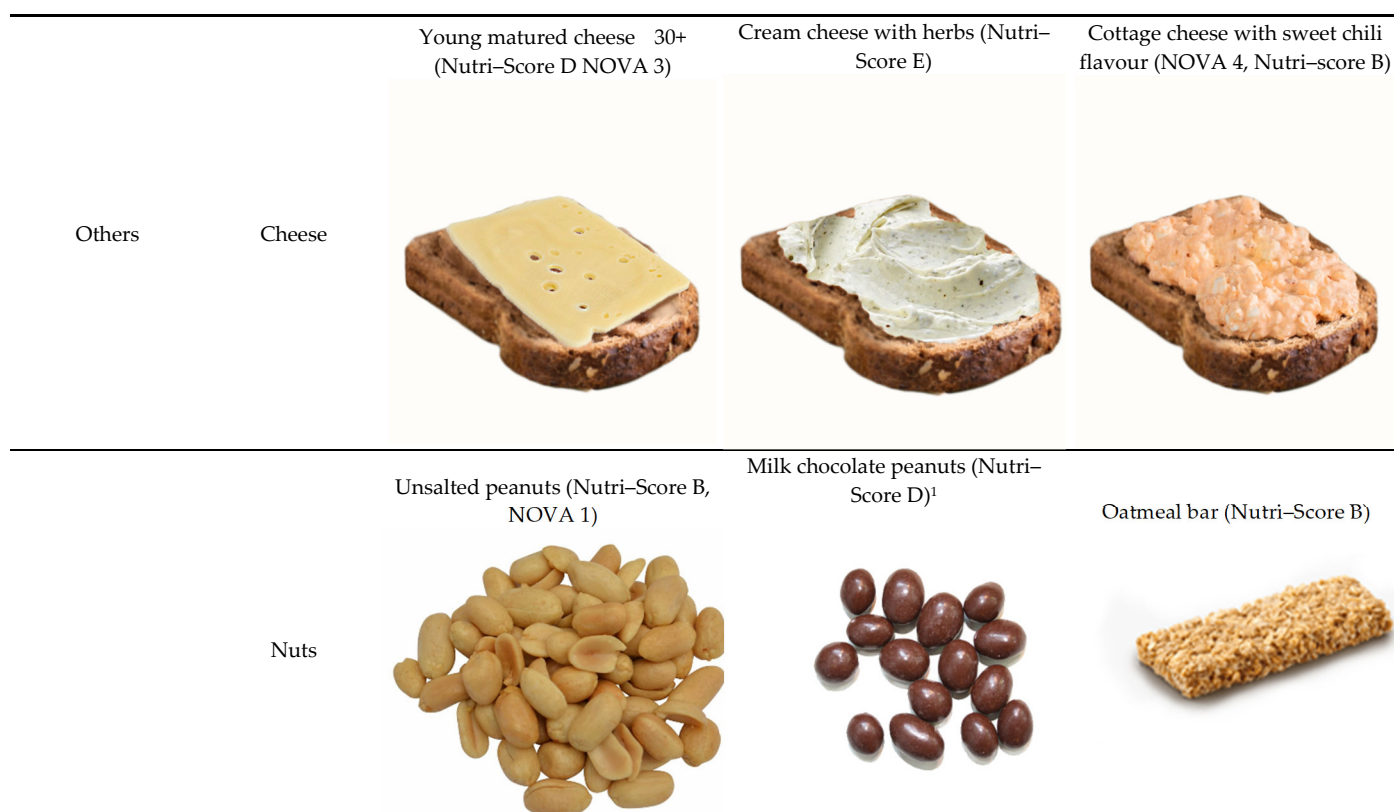

1. Food pictures retrieved from the food-pics extended database [1,2].

**Supplementary Table S2.** Medians (IQR) of healthiness perception (1 “not healthy at all”. 7 “very healthy”) of various food items in 13 categories of Dutch ( $n = 104$ – $108$ ), Italian ( $n = 75$ – $83$ ) and Brazilian ( $65$ – $74$ ) consumers.

| Product Category <sup>1</sup> | Nationality | MPF                        | High NS_UPF                | Low NS_UPF                 | <i>p</i>         |
|-------------------------------|-------------|----------------------------|----------------------------|----------------------------|------------------|
| Cereals                       | Dutch       | 6 (6–7) <sup>a</sup>       | 5 (5–6) <sup>b</sup>       | 2 (1–3) <sup>c</sup>       | <0.001           |
|                               | Italian     | 6 (5–7) <sup>a</sup>       | 6 (5–7) <sup>a</sup>       | 2 (1–3) <sup>b</sup>       | <0.001           |
|                               | Brazilian   | 7 (6–7) <sup>a</sup>       | 6 (5–7) <sup>b</sup>       | 2 (1–3) <sup>c</sup>       | <0.001           |
|                               | <b>All</b>  | <b>7 (6–7)<sup>a</sup></b> | <b>6 (5–7)<sup>b</sup></b> | <b>2 (1–3)<sup>c</sup></b> | <b>&lt;0.001</b> |
| Bread                         | Dutch       | 3 (2–5) <sup>a</sup>       | 5 (5–6) <sup>b</sup>       | 2 (1–3) <sup>c</sup>       | <0.001           |
|                               | Italian     | 5 (4–6) <sup>a</sup>       | 4 (3–5) <sup>b</sup>       | 3 (2–3.5) <sup>c</sup>     | <0.001           |
|                               | Brazilian   | 3 (2–5) <sup>a</sup>       | 5 (4–6) <sup>b</sup>       | 2 (1–3) <sup>c</sup>       | <0.001           |
|                               | <b>All</b>  | <b>4 (3–5)<sup>a</sup></b> | <b>5 (4–6)<sup>b</sup></b> | <b>2 (1–3)<sup>c</sup></b> | <b>&lt;0.001</b> |
| Biscuits                      | Dutch       | 5 (4–6) <sup>a</sup>       | 6 (5–6) <sup>b</sup>       | 4 (3–5) <sup>c</sup>       | <0.001           |
|                               | Italian     | 6 (4–7) <sup>a</sup>       | 5 (5–6) <sup>a</sup>       | 4 (3–5) <sup>b</sup>       | <0.001           |
|                               | Brazilian   | 5 (4–6) <sup>a</sup>       | 5 (3–6) <sup>a</sup>       | 2 (1–4) <sup>b</sup>       | <0.001           |
|                               | <b>All</b>  | <b>5 (4–6)<sup>a</sup></b> | <b>5 (5–6)<sup>b</sup></b> | <b>3 (2–5)<sup>c</sup></b> | <b>&lt;0.001</b> |
| Beverages                     | Dutch       | 6 (4–6) <sup>a</sup>       | 2 (1–3) <sup>b</sup>       | 2 (1–2) <sup>b</sup>       | <0.001           |
|                               | Italian     | 7 (6–7) <sup>a</sup>       | 1 (1–2) <sup>b</sup>       | 3 (2–5) <sup>c</sup>       | <0.001           |
|                               | Brazilian   | 7 (6–7) <sup>a</sup>       | 1 (1–1) <sup>b</sup>       | 4 (2–6) <sup>c</sup>       | <0.001           |
|                               | <b>All</b>  | <b>6 (5–7)<sup>a</sup></b> | <b>1 (1–2)<sup>b</sup></b> | <b>2 (1–4)<sup>c</sup></b> | <b>&lt;0.001</b> |
| Meat/beef                     | Dutch       | 5 (3–6) <sup>a</sup>       | 4 (3–5) <sup>b</sup>       | 2 (1.5–3) <sup>c</sup>     | <0.001           |
|                               | Italian     | 5 (4–6) <sup>a</sup>       | 4 (2–5) <sup>b</sup>       | 3 (2–3) <sup>c</sup>       | <0.001           |
|                               | Brazilian   | 6 (5–7) <sup>a</sup>       | 2.5 (1–5) <sup>b</sup>     | 1 (1–2) <sup>c</sup>       | <0.001           |
|                               | <b>All</b>  | <b>5 (4–6)<sup>a</sup></b> | <b>4 (2–5)<sup>b</sup></b> | <b>2 (1–3)<sup>c</sup></b> | <b>&lt;0.001</b> |
| Chicken                       | Dutch       | 5 (4–6) <sup>a</sup>       | 5 (4–6) <sup>a</sup>       | 1 (1–2) <sup>b</sup>       | <0.001           |
|                               | Italian     | 6 (5–7) <sup>a</sup>       | 5 (4–6) <sup>b</sup>       | 1 (1–2) <sup>c</sup>       | <0.001           |

|                    |            |                            |                            |                              |                  |
|--------------------|------------|----------------------------|----------------------------|------------------------------|------------------|
|                    | Brazilian  | 7 (6–7) <sup>a</sup>       | 6 (5–7) <sup>b</sup>       | 1 (1–2) <sup>c</sup>         | <0.001           |
|                    | <b>All</b> | <b>6 (5–7)<sup>a</sup></b> | <b>5 (4–6)<sup>b</sup></b> | <b>1 (1–2)<sup>c</sup></b>   | <b>&lt;0.001</b> |
| Milk               | Dutch      | 5 (5–6) <sup>a</sup>       | 3 (2–4) <sup>b</sup>       | 3 (2–5) <sup>b</sup>         | <0.001           |
|                    | Italian    | 5 (5–7) <sup>a</sup>       | 3 (3–5) <sup>b</sup>       | 3 (2–4) <sup>b</sup>         | <0.001           |
|                    | Brazilian  | 5 (3–5)                    | 3 (2–5)                    | 3 (2–5)                      | 0.063            |
|                    | <b>All</b> | <b>5 (4–6)<sup>a</sup></b> | <b>3 (2–5)<sup>b</sup></b> | <b>3 (2–5)<sup>b</sup></b>   | <b>&lt;0.001</b> |
| Yogurt             | Dutch      | 6 (5–6) <sup>a</sup>       | 3 (3–5) <sup>b</sup>       | 2 (2–3) <sup>c</sup>         | <0.001           |
|                    | Italian    | 6 (5–7) <sup>a</sup>       | 4 (3–6) <sup>b</sup>       | 4 (3–5) <sup>b</sup>         | <0.001           |
|                    | Brazilian  | 6 (5–7) <sup>a</sup>       | 5 (4–6) <sup>b</sup>       | 4 (3–6) <sup>b</sup>         | <0.001           |
|                    | <b>All</b> | <b>6 (5–7)<sup>a</sup></b> | <b>4 (3–5)<sup>b</sup></b> | <b>3 (2–5)<sup>c</sup></b>   | <b>&lt;0.001</b> |
| Potatoes           | Dutch      | 6 (5–6) <sup>a</sup>       | 3 (2.5–5) <sup>b</sup>     | 1 (1–2) <sup>c</sup>         | <0.001           |
|                    | Italian    | 6 (5–7) <sup>a</sup>       | 3 (2–4) <sup>b</sup>       | 1 (1–2) <sup>c</sup>         | <0.001           |
|                    | Brazilian  | 6 (5–7) <sup>a</sup>       | 4 (2–5) <sup>b</sup>       | 1 (1–2) <sup>c</sup>         | <0.001           |
|                    | <b>All</b> | <b>6 (5–7)<sup>a</sup></b> | <b>3 (2–5)<sup>b</sup></b> | <b>1 (1–2)<sup>c</sup></b>   | <b>&lt;0.001</b> |
| Ready to eat pasta | Dutch      | 4 (3–5) <sup>a</sup>       | 4 (3–5) <sup>b</sup>       | 2 (1–2) <sup>c</sup>         | <0.001           |
|                    | Italian    | 5 (4–6) <sup>a</sup>       | 5 (3–6) <sup>b</sup>       | 3 (1–4) <sup>c</sup>         | <0.001           |
|                    | Brazilian  | 4 (3–5) <sup>a</sup>       | 5 (3–6) <sup>a</sup>       | 2 (1–3) <sup>b</sup>         | <0.001           |
|                    | <b>All</b> | <b>5 (3–5)<sup>a</sup></b> | <b>4 (3–5)<sup>b</sup></b> | <b>2 (1–3)<sup>c</sup></b>   | <b>&lt;0.001</b> |
| Tomato             | Dutch      | 5 (3–6) <sup>a</sup>       | 4 (3–5) <sup>b</sup>       | 3 (2–4) <sup>c</sup>         | <0.001           |
|                    | Italian    | 5 (4–6) <sup>a</sup>       | 3 (2–4) <sup>b</sup>       | 2 (1–3) <sup>c</sup>         | <0.001           |
|                    | Brazilian  | 4 (2–5) <sup>a</sup>       | 3 (1–3) <sup>b</sup>       | 2 (1–3) <sup>c</sup>         | <0.001           |
|                    | <b>All</b> | <b>5 (3–6)<sup>a</sup></b> | <b>3 (2–4)<sup>b</sup></b> | <b>2.5 (1–3)<sup>c</sup></b> | <b>&lt;0.001</b> |
| Cheese             | Dutch      | 5 (4–6) <sup>a</sup>       | 3 (3–5) <sup>b</sup>       | 3 (2–4) <sup>c</sup>         | <0.001           |
|                    | Italian    | 4 (3–5) <sup>a</sup>       | 3 (2–4.5) <sup>b</sup>     | 3.5 (3–5) <sup>ab</sup>      | 0.050            |
|                    | Brazilian  | 5 (3–6) <sup>a</sup>       | 4 (3–6) <sup>ab</sup>      | 4 (2–5) <sup>b</sup>         | 0.004            |
|                    | <b>All</b> | <b>5 (3–5)<sup>a</sup></b> | <b>3 (2–5)<sup>b</sup></b> | <b>3 (2–5)<sup>b</sup></b>   | <b>&lt;0.001</b> |
| Peanuts            | Dutch      | 6 (5–6) <sup>a</sup>       | 4 (3–5) <sup>b</sup>       | 2 (1–3) <sup>c</sup>         | <0.001           |
|                    | Italian    | 4 (3–6) <sup>a</sup>       | 5 (4–6) <sup>b</sup>       | 2.5 (2–3) <sup>c</sup>       | <0.001           |
|                    | Brazilian  | 6 (5–7) <sup>a</sup>       | 5 (3–5) <sup>b</sup>       | 2 (1–3) <sup>c</sup>         | <0.001           |
|                    | <b>All</b> | <b>5 (4–6)<sup>a</sup></b> | <b>5 (3–5)<sup>b</sup></b> | <b>2 (1–3)<sup>c</sup></b>   | <b>&lt;0.001</b> |

<sup>a,b,c</sup>, Different letters indicate significant differences ( $p < 0.05$ ) of post hoc comparisons. Bold numbers indicate the medians (IQR) and  $p$ -values of the countries together. MPF = minimally processed food; High NS\_UPF = ultra-processed food with high Nutri\_Score; Low NS\_UPF = ultra-processed food with low Nutri-Score.

**Supplementary Table S3. Medians (IQR) of processing perception (1 “not processed at all”, 7 “very processed”) of various food items in 13 categories of Dutch ( $n = 104$ – $108$ ), Italian ( $n = 75$ – $83$ ) and Brazilian (65–74) consumers.**

| Product category <sup>1</sup> | NOVA classification | MPF                        | High NS_UPF                | Low NS_UPF                 | $p$              |
|-------------------------------|---------------------|----------------------------|----------------------------|----------------------------|------------------|
| Cereals                       | Dutch               | 2 (2–3) <sup>a</sup>       | 4 (3–5) <sup>b</sup>       | 6 (5–7) <sup>c</sup>       | <0.001           |
|                               | Italian             | 3 (2–5) <sup>a</sup>       | 3 (2–5) <sup>a</sup>       | 6 (5–7) <sup>b</sup>       | <0.001           |
|                               | Brazilian           | 2 (1–3.5) <sup>a</sup>     | 3 (1–4) <sup>a</sup>       | 6 (5–7) <sup>b</sup>       | <0.001           |
|                               | <b>All</b>          | <b>2 (2–4)<sup>a</sup></b> | <b>4 (2–5)<sup>b</sup></b> | <b>6 (5–7)<sup>c</sup></b> | <b>&lt;0.001</b> |
| Bread                         | Dutch               | 5 (3–5) <sup>a</sup>       | 5 (3–6) <sup>a</sup>       | 5 (4–6) <sup>b</sup>       | 0.021            |
|                               | Italian             | 4 (3–5) <sup>a</sup>       | 5 (4–6) <sup>b</sup>       | 5 (4–6) <sup>b</sup>       | <0.001           |
|                               | Brazilian           | 5 (3–6)                    | 5 (3–6)                    | 5 (3–7)                    | 0.55             |
|                               | <b>All</b>          | <b>5 (3–5)<sup>a</sup></b> | <b>5 (4–6)<sup>b</sup></b> | <b>5 (4–6)<sup>b</sup></b> | <b>&lt;0.001</b> |
| Biscuits                      | Dutch               | 4 (3–5) <sup>a</sup>       | 5 (3–5) <sup>a</sup>       | 5 (4–6) <sup>b</sup>       | <0.001           |
|                               | Italian             | 5 (3–6)                    | 5 (4–6)                    | 5 (4–6)                    | 0.21             |
|                               | Brazilian           | 5 (3–6) <sup>a</sup>       | 5 (3–6) <sup>a</sup>       | 6 (5–7) <sup>b</sup>       | <0.001           |

|                    |            |                              |                            |                            |                  |
|--------------------|------------|------------------------------|----------------------------|----------------------------|------------------|
|                    | <b>All</b> | <b>5 (3–5.5)<sup>a</sup></b> | <b>5 (3–5)<sup>a</sup></b> | <b>5 (4–6)<sup>b</sup></b> | <b>&lt;0.001</b> |
| Beverages          | Dutch      | 2 (1–3) <sup>a</sup>         | 7 (6–7) <sup>b</sup>       | 6 (5–7) <sup>c</sup>       | <0.001           |
|                    | Italian    | 2 (1–3) <sup>a</sup>         | 7 (6–7) <sup>b</sup>       | 5 (3–6) <sup>c</sup>       | <0.001           |
|                    | Brazilian  | 1 (1–2) <sup>a</sup>         | 7 (7–7) <sup>b</sup>       | 5 (3–6) <sup>c</sup>       | <0.001           |
|                    | <b>All</b> | <b>2 (1–3)<sup>a</sup></b>   | <b>7 (6–7)<sup>b</sup></b> | <b>5 (4–7)<sup>c</sup></b> | <b>&lt;0.001</b> |
| Meat/beef          | Dutch      | 3 (2–4) <sup>a</sup>         | 6 (5–6) <sup>b</sup>       | 5 (5–6) <sup>b</sup>       | <0.001           |
|                    | Italian    | 2 (1–3) <sup>a</sup>         | 6 (5–7) <sup>b</sup>       | 5 (4–7) <sup>b</sup>       | <0.001           |
|                    | Brazilian  | 2 (1–3) <sup>a</sup>         | 6 (5–7) <sup>b</sup>       | 7 (6–7) <sup>c</sup>       | <0.001           |
|                    | <b>All</b> | <b>2 (1–3)<sup>a</sup></b>   | <b>6 (5–7)<sup>b</sup></b> | <b>6 (5–7)<sup>b</sup></b> | <b>&lt;0.001</b> |
| Chicken            | Dutch      | 3 (2–5) <sup>a</sup>         | 4 (3–5) <sup>b</sup>       | 7 (6–7) <sup>c</sup>       | <0.001           |
|                    | Italian    | 3 (2–5) <sup>a</sup>         | 5 (3–6) <sup>b</sup>       | 6 (5–7) <sup>c</sup>       | <0.001           |
|                    | Brazilian  | 2 (1–3) <sup>a</sup>         | 3 (2–5) <sup>b</sup>       | 7 (6–7) <sup>c</sup>       | <0.001           |
|                    | <b>All</b> | <b>3 (2–5)<sup>a</sup></b>   | <b>4 (3–5)<sup>b</sup></b> | <b>7 (6–7)<sup>c</sup></b> | <b>&lt;0.001</b> |
| Milk               | Dutch      | 4 (2–5) <sup>a</sup>         | 5 (5–6) <sup>b</sup>       | 5 (5–6) <sup>b</sup>       | <0.001           |
|                    | Italian    | 5 (3–5) <sup>a</sup>         | 5 (4–6) <sup>b</sup>       | 5 (5–6) <sup>b</sup>       | <0.001           |
|                    | Brazilian  | 5 (3–6) <sup>a</sup>         | 6 (5–6) <sup>b</sup>       | 6 (5–7) <sup>b</sup>       | 0.004            |
|                    | <b>All</b> | <b>4 (3–5)<sup>a</sup></b>   | <b>5 (5–6)<sup>b</sup></b> | <b>5 (5–6)<sup>b</sup></b> | <b>&lt;0.001</b> |
| Yogurt             | Dutch      | 3 (2–5) <sup>a</sup>         | 5 (5–6) <sup>b</sup>       | 6 (5–6) <sup>b</sup>       | <0.001           |
|                    | Italian    | 3.5 (2–5) <sup>a</sup>       | 5 (4–5) <sup>b</sup>       | 5 (3.5–5.5) <sup>b</sup>   | <0.001           |
|                    | Brazilian  | 4 (3–5) <sup>a</sup>         | 5 (5–6) <sup>b</sup>       | 5 (4–6) <sup>b</sup>       | <0.001           |
|                    | <b>All</b> | <b>4 (2–5)<sup>a</sup></b>   | <b>5 (5–6)<sup>b</sup></b> | <b>5 (4–6)<sup>b</sup></b> | <b>&lt;0.001</b> |
| Potatoes           | Dutch      | 2 (1–2) <sup>a</sup>         | 4 (3–5) <sup>b</sup>       | 6 (5–7) <sup>c</sup>       | <0.001           |
|                    | Italian    | 1 (1–2) <sup>a</sup>         | 4 (3–5) <sup>b</sup>       | 6 (6–7) <sup>c</sup>       | <0.001           |
|                    | Brazilian  | 1 (1–2) <sup>a</sup>         | 4 (2–5) <sup>b</sup>       | 7 (6–7) <sup>c</sup>       | <0.001           |
|                    | <b>All</b> | <b>1 (1–2)<sup>a</sup></b>   | <b>4 (3–5)<sup>b</sup></b> | <b>6 (6–7)<sup>c</sup></b> | <b>&lt;0.001</b> |
| Ready to eat pasta | Dutch      | 4 (3–5) <sup>a</sup>         | 4 (3–5) <sup>b</sup>       | 6 (6–7) <sup>c</sup>       | <0.001           |
|                    | Italian    | 4 (3–5) <sup>a</sup>         | 5 (3–6) <sup>b</sup>       | 6 (5–7) <sup>c</sup>       | <0.001           |
|                    | Brazilian  | 5 (3–6) <sup>a</sup>         | 4 (3–5) <sup>a</sup>       | 6 (5–7) <sup>b</sup>       | <0.001           |
|                    | <b>All</b> | <b>4 (3–5)<sup>a</sup></b>   | <b>5 (4–6)<sup>b</sup></b> | <b>6 (5–7)<sup>c</sup></b> | <b>&lt;0.001</b> |
| Tomato             | Dutch      | 5 (3–6) <sup>a</sup>         | 5 (5–6) <sup>b</sup>       | 5 (5–6) <sup>b</sup>       | <0.001           |
|                    | Italian    | 4 (3–5) <sup>a</sup>         | 5 (4.5–6.5) <sup>b</sup>   | 6 (5–7) <sup>b</sup>       | <0.001           |
|                    | Brazilian  | 5 (3–7) <sup>a</sup>         | 6 (5–7) <sup>b</sup>       | 6 (5–7) <sup>b</sup>       | <0.001           |
|                    | <b>All</b> | <b>5 (3–6)<sup>a</sup></b>   | <b>6 (5–7)<sup>b</sup></b> | <b>6 (5–7)<sup>b</sup></b> | <b>&lt;0.001</b> |
| Cheese             | Dutch      | 4 (3–5) <sup>b</sup>         | 5 (5–6) <sup>a</sup>       | 5 (5–6) <sup>a</sup>       | <0.001           |
|                    | Italian    | 5 (4–6)                      | 5 (4–6)                    | 5 (4–6)                    | 0.048            |
|                    | Brazilian  | 5 (3–6) <sup>a</sup>         | 5 (4–6) <sup>ab</sup>      | 5 (5–6) <sup>b</sup>       | 0.040            |
|                    | <b>All</b> | <b>5 (3–5)<sup>a</sup></b>   | <b>5 (4–6)<sup>b</sup></b> | <b>5 (5–6)<sup>b</sup></b> | <b>&lt;0.001</b> |
| Peanuts            | Dutch      | 2 (1–3) <sup>a</sup>         | 5 (5–6) <sup>b</sup>       | 5 (5–6) <sup>b</sup>       | <0.001           |
|                    | Italian    | 3 (2–4) <sup>a</sup>         | 5 (4–6) <sup>b</sup>       | 5 (5–6) <sup>c</sup>       | <0.001           |
|                    | Brazilian  | 2 (1–3) <sup>a</sup>         | 5 (3–7) <sup>b</sup>       | 5 (4–6) <sup>b</sup>       | <0.001           |
|                    | <b>All</b> | <b>2 (1–4)<sup>a</sup></b>   | <b>5 (4–6)<sup>b</sup></b> | <b>5 (5–6)<sup>b</sup></b> | <b>&lt;0.001</b> |

<sup>a,b,c</sup> Different letters indicate significant differences ( $p < 0.05$ ) of post hoc comparisons. Bold numbers indicate the medians (IQR) and  $p$ -values of the countries together. MPF = minimally processed food; High NS\_UPF = ultra-processed food with high Nutri\_Score; Low NS\_UPF = ultra-processed food with low Nutri-Score.

## References

1. Bleichert, J.; Lender, A.; Polk, S.; Busch, N.A.; Ohla, K. Food-pics\_extended—An image database for experimental research on eating and appetite: Additional images, normative ratings and an updated review. *Front. Psychol.* **2019**, *10*, 307. <https://doi.org/10.3389/fpsyg.2019.00307>.

- 
2. Blechert, J.; Meule, A.; Busch, N.A.; Ohla, K. Food-pics: An image database for experimental research on eating and appetite. *Front. Psychol.* **2014**, *5*, 617. <https://doi.org/10.3389/fpsyg.2014.00617>.
